# Supplementary material for: The mechanism and kinetics of the atmospheric oxidation of CF3(CF2)2CHCH2 (HFC-1447fz) by hydroxyl radicals: ab initio investigation
Source: Royal Society of Chemistry journal article supplement (doi:10.1039/d3cp06149c), 2024-01-01
Supplement: d3cp06149c1.pdf [file d3cp06149c1.pdf]

The Mechanism and Kinetics of the Atmospheric Oxidation of  $\text{CF}_3(\text{CF}_2)_2\text{CH}=\text{CH}_2$  (HFC-1447fz) by hydroxyl radical: Ab Initio investigation

Youqing Yu<sup>1\*</sup>, Li Pan<sup>2</sup>, Qiyao Sun<sup>1</sup>, Jie Wang<sup>1</sup>

1. Green intelligence Environmental School, Yangtze Normal University, Chongqing, China

2. Chongqing Medical and health school, Chongqing, China

## Contents

(1) **Table S1:** Cartesian Coordinates (in Å) of all species at M06-2X/6-311++G(d,p) level of theory.

(2) **Table S2.** The excitation energy  $T_V$  (in eV), wavelength  $\lambda$  (in nm) and oscillator strength  $f$  (in atomic units) of the calculated excited states of the intermediates involved in the reaction of HFC-1447fz + OH, calculated using TD-DFT calculations at the M06-2X/6-311++G(d, p) level.

(3) **Figure S1.** Arrhenius plot for the reaction between HFC-1447fz and OH radical.

(4) **Figure S2.** Potential energy profile of the degradation of P1 calculated at the CCSD(T)/cc-pVTZ//M06-2X/6-311++G (d, p) level of theory.

(5) **Figure S3.** Potential energy profile of the degradation of P2 calculated at the CCSD(T)/cc-pVTZ//M06-2X/6-311++G (d, p) level of theory.

(6) **Global warming potential calculation.**

(7) **Photochemical ozone creation potential (POCP) calculation.**

**Table S1:** Cartesian Coordinates (in Å) of all species at M06-2X/6-311++G(d,p) level of theory.

| Species    |             | X           | Y           | Z           |
|------------|-------------|-------------|-------------|-------------|
| HFC-1447fz | C           | -1.56910600 | -0.08677600 | -0.09282800 |
|            | C           | -0.16838300 | 0.54059000  | 0.09125800  |
|            | C           | 1.01743100  | -0.45160000 | 0.11462600  |
|            | C           | 2.29549500  | 0.20626500  | 0.53124500  |
|            | H           | 2.34240100  | 0.49229700  | 1.57545000  |
|            | C           | 3.28118300  | 0.42636400  | -0.32430900 |
|            | H           | 4.19833000  | 0.90271000  | -0.00182200 |
|            | H           | 3.19963200  | 0.13411600  | -1.36439800 |
|            | F           | 1.11217800  | -0.99745600 | -1.11636200 |
|            | F           | 0.69372900  | -1.44475900 | 0.98154400  |
|            | F           | -0.18475800 | 1.21818500  | 1.25523600  |
|            | F           | 0.02655700  | 1.41143900  | -0.91102000 |
|            | F           | -1.59218700 | -0.88034900 | -1.15656600 |
|            | F           | -1.91691000 | -0.78653600 | 0.97853900  |
| F          | -2.45861900 | 0.88634300  | -0.26794700 |             |
| OH         | O           | 0.00000000  | 0.00000000  | 0.10800100  |
|            | H           | 0.00000000  | 0.00000000  | -0.86401200 |
| TS1        | C           | 1.79674200  | -0.06540600 | 0.00132200  |
|            | C           | 0.35319900  | 0.49679100  | -0.06016800 |
|            | C           | -0.74738900 | -0.59820400 | 0.01801000  |
|            | C           | -2.05916100 | -0.24982800 | -0.63063400 |
|            | H           | -1.98711400 | 0.13886600  | -1.63768400 |
|            | C           | -3.21868100 | -0.70478200 | -0.11967000 |
|            | H           | -4.14458100 | -0.56730900 | -0.66133800 |
|            | H           | -3.25733600 | -1.17744000 | 0.85461900  |
|            | F           | -0.91288100 | -0.92292100 | 1.31790000  |
|            | F           | -0.24978000 | -1.70000200 | -0.60885100 |
|            | F           | 0.23848100  | 1.16722800  | -1.21793300 |
|            | F           | 0.22591800  | 1.34733000  | 0.96540200  |
|            | F           | 1.92006800  | -0.90780500 | 1.02228300  |
|            | F           | 2.11894500  | -0.69038700 | -1.12292200 |
|            | F           | 2.64563100  | 0.94234300  | 0.17653100  |
|            | O           | -2.33817900 | 1.70574500  | 0.05084500  |
| H          | -2.53122900 | 1.56642600  | 0.99279300  |             |
| TS1a       | C           | 1.83817200  | -0.21806400 | 0.08717800  |
|            | C           | 0.51932800  | 0.54321100  | -0.17965100 |
|            | C           | -0.77865500 | -0.28529600 | -0.02331900 |
|            | C           | -1.98244300 | 0.47434600  | -0.50632100 |
|            | H           | -2.17571100 | 0.40072800  | -1.56851100 |

|      |   |             |             |             |
|------|---|-------------|-------------|-------------|
|      | C | -2.56816400 | 1.40669300  | 0.27139600  |
|      | H | -3.37130900 | 2.01825700  | -0.11628200 |
|      | H | -2.28239100 | 1.53046800  | 1.30965700  |
|      | F | -0.89989700 | -0.59519200 | 1.29047600  |
|      | F | -0.60990900 | -1.42890900 | -0.71245600 |
|      | F | 0.57505100  | 1.01794900  | -1.43732900 |
|      | F | 0.47093300  | 1.58257900  | 0.67048000  |
|      | F | 1.80198000  | -0.81507200 | 1.27228800  |
|      | F | 2.05824900  | -1.12683900 | -0.85168900 |
|      | F | 2.84473000  | 0.65087300  | 0.07856500  |
|      | O | -3.39517000 | -0.99939400 | -0.14251300 |
|      | H | -3.34889600 | -1.04815800 | 0.82652900  |
| TS2  | C | 1.82960400  | 0.16699300  | 0.13556100  |
|      | C | 0.35034500  | 0.37821000  | -0.26011200 |
|      | C | -0.59399000 | -0.82544500 | -0.03345000 |
|      | C | -1.94923500 | -0.62158200 | -0.63127900 |
|      | H | -1.97591100 | -0.55544700 | -1.71190700 |
|      | C | -3.06012100 | -0.50382300 | 0.12723700  |
|      | H | -4.03481000 | -0.49387700 | -0.33855200 |
|      | H | -3.01921100 | -0.64102900 | 1.19972500  |
|      | F | -0.66397800 | -1.03887000 | 1.29779500  |
|      | F | 0.00346500  | -1.90736700 | -0.59511500 |
|      | F | 0.32022300  | 0.71424300  | -1.55966200 |
|      | F | -0.11551600 | 1.41877600  | 0.46215500  |
|      | F | 1.92075100  | -0.27137400 | 1.38456800  |
|      | F | 2.41392400  | -0.70257700 | -0.67550200 |
|      | F | 2.46865800  | 1.32900900  | 0.04306700  |
|      | O | -3.16125700 | 1.55445900  | 0.14770900  |
|      | H | -2.26737600 | 1.81200800  | 0.42556800  |
| TS2a | C | -1.89884900 | -0.23188700 | -0.13826700 |
|      | C | -0.59995200 | 0.57184200  | 0.09709600  |
|      | C | 0.69874700  | -0.25880000 | 0.21902900  |
|      | C | 1.87580200  | 0.57379300  | 0.61171000  |
|      | H | 1.99184700  | 0.75274300  | 1.67303200  |
|      | C | 2.75424000  | 1.02411400  | -0.30696900 |
|      | H | 2.56472100  | 0.90519300  | -1.36615200 |
|      | H | 3.56524900  | 1.67567500  | -0.01562400 |
|      | F | 0.90699800  | -0.86211100 | -0.97806100 |
|      | F | 0.47819300  | -1.23263600 | 1.13382700  |
|      | F | -0.76102100 | 1.27818000  | 1.22995600  |
|      | F | -0.45661000 | 1.42657800  | -0.92896800 |
|      | F | -1.77751000 | -1.01250500 | -1.20497500 |
|      | F | -2.18711500 | -0.98045400 | 0.91731500  |
|      | F | -2.90084200 | 0.61711500  | -0.34243400 |

|     |   |             |             |             |
|-----|---|-------------|-------------|-------------|
|     | O | 3.97584100  | -0.64804200 | -0.14335300 |
|     | H | 3.37268500  | -1.33114500 | -0.47996800 |
| TS3 | C | 1.81426300  | 0.16007200  | -0.06240700 |
|     | C | 0.39286300  | 0.00663000  | 0.52491600  |
|     | C | -0.71320000 | -0.38915700 | -0.47929700 |
|     | C | -2.07155100 | -0.37360400 | 0.13810300  |
|     | H | -2.53222600 | 0.76286000  | 0.28100800  |
|     | C | -2.77400200 | -1.42277900 | 0.50730100  |
|     | H | -2.36838800 | -2.42581900 | 0.40144000  |
|     | H | -3.76835900 | -1.31357200 | 0.92379600  |
|     | F | -0.41194900 | -1.61091700 | -0.96715800 |
|     | F | -0.66792200 | 0.49288400  | -1.51148400 |
|     | F | 0.05911900  | 1.18056900  | 1.08405500  |
|     | F | 0.44641900  | -0.93339200 | 1.48175900  |
|     | F | 2.18913800  | -0.95184200 | -0.68255700 |
|     | F | 1.86301200  | 1.17204600  | -0.91854500 |
|     | F | 2.66461300  | 0.40240800  | 0.92951900  |
|     | O | -2.98755900 | 1.90307400  | 0.08348600  |
|     | H | -2.60264700 | 2.09916300  | -0.78613100 |
| TS4 | C | 1.77275200  | -0.35699700 | -0.09061100 |
|     | C | 0.44078900  | 0.09718700  | 0.54848300  |
|     | C | -0.60980300 | 0.68028800  | -0.42452100 |
|     | C | -1.77597800 | 1.28049000  | 0.30139600  |
|     | H | -1.62155600 | 2.30380800  | 0.63339800  |
|     | C | -2.88976100 | 0.62774900  | 0.55851700  |
|     | H | -3.75041700 | 1.02438800  | 1.08496900  |
|     | H | -3.07598400 | -0.55102000 | 0.23015700  |
|     | F | -0.99430900 | -0.32342500 | -1.25040800 |
|     | F | 0.00043400  | 1.61849200  | -1.18229400 |
|     | F | 0.73378800  | 1.03291700  | 1.46878800  |
|     | F | -0.10255300 | -0.96389500 | 1.16342100  |
|     | F | 1.54676800  | -1.21846700 | -1.07563900 |
|     | F | 2.44424800  | 0.68175300  | -0.56778100 |
|     | F | 2.51561000  | -0.95279500 | 0.83561500  |
|     | O | -3.24681400 | -1.72590500 | -0.13542800 |
|     | H | -2.50140600 | -1.81346800 | -0.74999900 |
| TS5 | C | 2.02215700  | -0.14009200 | -0.06759500 |
|     | C | 0.52159600  | -0.49526300 | 0.03786900  |
|     | C | -0.45325700 | 0.69991200  | 0.14349500  |
|     | C | -1.86189800 | 0.24718300  | 0.40225700  |
|     | H | -2.04567200 | -0.16899400 | 1.38719200  |
|     | C | -2.80132600 | 0.35807200  | -0.51263700 |
|     | H | -3.93105300 | -0.00320800 | -0.19818600 |
|     | H | -2.69786400 | 0.74879400  | -1.51843200 |

|      |   |             |             |             |
|------|---|-------------|-------------|-------------|
|      | F | -0.36152000 | 1.40683700  | -1.00155700 |
|      | F | -0.02363200 | 1.49069600  | 1.15481800  |
|      | F | 0.36580600  | -1.26746000 | 1.12901300  |
|      | F | 0.19503200  | -1.21333800 | -1.04851700 |
|      | F | 2.23980700  | 0.66696000  | -1.09818800 |
|      | F | 2.44774400  | 0.44666200  | 1.04219700  |
|      | F | 2.71664300  | -1.25915400 | -0.24839000 |
|      | O | -4.92830600 | -0.68518400 | 0.14401900  |
|      | H | -4.68151300 | -1.55481900 | -0.20745300 |
| TS6  | C | 2.04340200  | -0.37313900 | 0.07671700  |
|      | C | 0.80570800  | 0.45106600  | -0.34747600 |
|      | C | -0.55046800 | -0.04746800 | 0.21496000  |
|      | C | -1.73851500 | 0.65041500  | -0.40128000 |
|      | H | -1.87266100 | 0.51740800  | -1.46842300 |
|      | F | -0.54510900 | 0.21006600  | 1.55244700  |
|      | F | -0.61617600 | -1.37078300 | 0.03199900  |
|      | F | 0.74570400  | 0.43148400  | -1.68934000 |
|      | F | 0.99068100  | 1.71841800  | 0.05863600  |
|      | F | 2.08132300  | -0.50239600 | 1.39755200  |
|      | F | 2.01780000  | -1.57502000 | -0.47870900 |
|      | F | 3.14078900  | 0.25880900  | -0.32374700 |
|      | O | -1.93913200 | 1.91689700  | 0.00674300  |
|      | H | -1.66318000 | 2.02785000  | 0.92615100  |
|      | C | -3.37545200 | -0.47142100 | 0.22270800  |
|      | H | -4.02086400 | 0.40888300  | 0.06569100  |
|      | H | -2.97904400 | -0.59199300 | 1.24849000  |
|      | O | -3.42429600 | -1.43615500 | -0.54489600 |
| TS6a | C | 1.97366800  | 0.06372300  | 0.01148300  |
|      | C | 0.47387700  | 0.44698200  | -0.05990500 |
|      | C | -0.48207500 | -0.76479400 | 0.00920500  |
|      | C | -1.87173600 | -0.53331900 | -0.53018000 |
|      | H | -1.93583800 | -0.18525200 | -1.55410500 |
|      | F | -0.58086800 | -1.17362400 | 1.30102600  |
|      | F | 0.09464100  | -1.79036200 | -0.67274600 |
|      | F | 0.27298200  | 1.08982800  | -1.21945400 |
|      | F | 0.22084400  | 1.26703100  | 0.96578200  |
|      | F | 2.18359900  | -0.76785100 | 1.02776500  |
|      | F | 2.37218000  | -0.51285700 | -1.11296300 |
|      | F | 2.69239300  | 1.16250400  | 0.20106100  |
|      | O | -2.73087100 | -1.53210300 | -0.25174800 |
|      | H | -2.53165200 | -1.92184000 | 0.60981500  |
|      | C | -2.66573700 | 1.16215200  | 0.38551200  |
|      | H | -3.67892300 | 0.78510800  | 0.17225000  |
|      | H | -2.25501300 | 0.88720800  | 1.37553200  |

|      |             |             |             |             |
|------|-------------|-------------|-------------|-------------|
|      | O           | -2.20269000 | 2.12139100  | -0.23755400 |
| TS7  | C           | -2.04837000 | -0.05278300 | 0.05583000  |
|      | C           | -0.56981900 | -0.46467200 | -0.14321300 |
|      | C           | 0.44412800  | 0.68550200  | 0.07102000  |
|      | F           | 0.68993800  | 0.80740200  | 1.37940400  |
|      | F           | -0.12653000 | 1.83224500  | -0.36958600 |
|      | F           | -0.43651600 | -0.92620500 | -1.40365300 |
|      | F           | -0.30678500 | -1.45923000 | 0.71047900  |
|      | F           | -2.18068800 | 0.61751400  | 1.19485600  |
|      | F           | -2.46812000 | 0.70186200  | -0.94948800 |
|      | F           | -2.80150700 | -1.14417100 | 0.10892400  |
|      | O           | 2.76804000  | 1.14192600  | -0.24526900 |
|      | H           | 3.36825800  | 0.11043300  | 0.30705100  |
|      | C           | 1.77018900  | 0.54219000  | -0.70137900 |
|      | H           | 1.65041900  | 0.35044100  | -1.77251100 |
|      | O           | 2.20222100  | -1.20744800 | -0.20335700 |
|      | O           | 3.28929300  | -1.00786000 | 0.41531400  |
| TS8  | C           | 1.96028400  | 0.14582200  | 0.01329400  |
|      | C           | 0.43454400  | 0.37287200  | -0.10998600 |
|      | C           | -0.43484200 | -0.89271000 | 0.06386000  |
|      | C           | -2.70904700 | 0.96770300  | 0.38218200  |
|      | H           | -3.70086200 | 0.62611100  | 0.12050700  |
|      | H           | -2.32529600 | 0.75702800  | 1.37621700  |
|      | F           | -0.53575700 | -1.15383000 | 1.37659100  |
|      | F           | 0.25000100  | -1.91306400 | -0.51329900 |
|      | F           | 0.19707800  | 0.92044500  | -1.31536700 |
|      | F           | 0.09496800  | 1.28494500  | 0.83279200  |
|      | F           | 2.23125800  | -0.54661600 | 1.11143500  |
|      | F           | 2.42804200  | -0.49779300 | -1.04409800 |
|      | F           | 2.56578300  | 1.32764600  | 0.08944300  |
|      | O           | -2.37590400 | 2.12419300  | -0.20497100 |
|      | H           | -1.55590100 | 2.46935500  | 0.16542800  |
|      | C           | -1.83941100 | -0.86175100 | -0.59013600 |
| H    | -1.89763700 | -0.33604500 | -1.55460800 |             |
| O    | -2.63307400 | -1.71215100 | -0.23256700 |             |
| TS8a | C           | -2.09157700 | -0.15774900 | 0.02347700  |
|      | C           | -0.57953700 | -0.44571800 | -0.13425700 |
|      | C           | 0.34101000  | 0.77856200  | 0.06415200  |
|      | C           | 2.50343700  | -1.19849000 | 0.28188800  |
|      | H           | 2.22639800  | -0.89269500 | 1.28771200  |
|      | H           | 1.99873300  | -2.04355600 | -0.17022300 |
|      | F           | 0.45359500  | 1.01311200  | 1.38096300  |
|      | F           | -0.28382300 | 1.84302400  | -0.50052200 |
|      | F           | -0.38582100 | -0.94749600 | -1.37047200 |

|     |   |             |             |             |
|-----|---|-------------|-------------|-------------|
|     | F | -0.25284000 | -1.39593300 | 0.76072300  |
|     | F | -2.31203600 | 0.52739500  | 1.13862800  |
|     | F | -2.55160800 | 0.52778100  | -1.01206300 |
|     | F | -2.74774800 | -1.31158600 | 0.09134600  |
|     | O | 3.77266700  | -1.07357100 | -0.09916400 |
|     | H | 4.13261200  | -0.23716300 | 0.23113800  |
|     | C | 1.74057300  | 0.67104700  | -0.57833300 |
|     | H | 1.76111800  | 0.22341100  | -1.58264400 |
|     | O | 2.61736300  | 1.41824900  | -0.16395700 |
| TS9 | O | 1.19915800  | 0.51350300  | 0.00000000  |
|     | H | 0.00000000  | 1.01093600  | 0.00000000  |
|     | C | 0.88702900  | -0.70615800 | 0.00000000  |
|     | H | 0.93506800  | -1.28698900 | 0.92843700  |
|     | H | 0.93506800  | -1.28698900 | -0.92843700 |
|     | O | -1.10111100 | 0.73858600  | 0.00000000  |
|     | O | -0.99708500 | -0.52709000 | 0.00000000  |
| P1  | C | 1.79816200  | -0.16880700 | -0.00894000 |
|     | C | 0.42607600  | 0.54372600  | -0.09071300 |
|     | C | -0.78610900 | -0.40186400 | 0.09451900  |
|     | C | -2.09895900 | 0.14671600  | -0.46870000 |
|     | H | -1.93615300 | 0.31298000  | -1.54081100 |
|     | C | -3.20389300 | -0.82363400 | -0.23636700 |
|     | H | -4.21826900 | -0.46596200 | -0.34344700 |
|     | H | -3.01064600 | -1.88368800 | -0.15501700 |
|     | F | -0.91551300 | -0.64219600 | 1.41986600  |
|     | F | -0.49433200 | -1.57985400 | -0.50840000 |
|     | F | 0.35231800  | 1.12907900  | -1.29966600 |
|     | F | 0.40819200  | 1.49134600  | 0.85465100  |
|     | F | 1.85465200  | -0.93772500 | 1.07348500  |
|     | F | 2.00892000  | -0.91601900 | -1.08431100 |
|     | F | 2.76075500  | 0.74364500  | 0.06420300  |
|     | O | -2.35307500 | 1.41927800  | 0.07730900  |
|     | H | -2.59691200 | 1.31115200  | 1.00354800  |
| P1a | C | 1.80752900  | -0.15132800 | 0.00440400  |
|     | C | 0.42678900  | 0.53924700  | -0.09631300 |
|     | C | -0.78159400 | -0.41019400 | 0.06991200  |
|     | C | -2.09897100 | 0.14840300  | -0.47564400 |
|     | H | -1.98409600 | 0.24920200  | -1.55567600 |
|     | C | -2.44305500 | 1.45380300  | 0.15445300  |
|     | H | -2.99764600 | 2.19037800  | -0.40751400 |
|     | H | -2.31823800 | 1.58918300  | 1.22115100  |
|     | F | -0.92129800 | -0.67911000 | 1.39263800  |
|     | F | -0.47930000 | -1.57081600 | -0.54779300 |
|     | F | 0.35669000  | 1.12738500  | -1.30676900 |

|     |   |             |             |             |
|-----|---|-------------|-------------|-------------|
|     | F | 0.38095000  | 1.49459600  | 0.84523200  |
|     | F | 1.86156800  | -0.91435100 | 1.09007500  |
|     | F | 2.04208600  | -0.89657100 | -1.06591800 |
|     | F | 2.75420400  | 0.77779500  | 0.08665800  |
|     | O | -3.10319700 | -0.83202600 | -0.28755000 |
|     | H | -3.29272600 | -0.90250600 | 0.65446000  |
| P2  | C | -1.79589400 | -0.25701300 | 0.17390000  |
|     | C | -0.32915400 | -0.32525600 | -0.30458900 |
|     | C | 0.54671200  | 0.93059200  | -0.06458700 |
|     | C | 1.96540900  | 0.71143400  | -0.43798500 |
|     | H | 2.22663000  | 0.90685200  | -1.47035200 |
|     | C | 2.92260300  | -0.00208300 | 0.45949300  |
|     | H | 3.86055800  | 0.55517500  | 0.50735200  |
|     | H | 2.51986600  | -0.07100600 | 1.47432300  |
|     | F | 0.42582900  | 1.24986000  | 1.24993900  |
|     | F | 0.01035100  | 1.93981600  | -0.78801000 |
|     | F | -0.33391800 | -0.59247500 | -1.61884800 |
|     | F | 0.24930600  | -1.36737900 | 0.33869400  |
|     | F | -1.85582100 | -0.16389200 | 1.49507400  |
|     | F | -2.41463200 | 0.78470000  | -0.36497700 |
|     | F | -2.42233000 | -1.36831500 | -0.20134700 |
|     | O | 3.26508600  | -1.27959100 | -0.05582000 |
|     | H | 2.48512300  | -1.84116800 | -0.01688100 |
| P2a | C | -1.92403200 | -0.12395400 | 0.12607000  |
|     | C | -0.45341700 | -0.41045300 | -0.24813900 |
|     | C | 0.56046000  | 0.74029700  | -0.02839700 |
|     | C | 1.92979100  | 0.39636300  | -0.47500800 |
|     | H | 2.25375700  | 0.76789700  | -1.43768900 |
|     | C | 2.77656900  | -0.56803600 | 0.27160800  |
|     | H | 2.57284000  | -0.48722600 | 1.34701000  |
|     | H | 2.52478000  | -1.59626500 | -0.03365800 |
|     | F | 0.53542000  | 1.03087700  | 1.30026300  |
|     | F | 0.09715300  | 1.82066600  | -0.69701000 |
|     | F | -0.42680200 | -0.75939900 | -1.54574200 |
|     | F | -0.04569000 | -1.46554500 | 0.48599700  |
|     | F | -2.02774500 | 0.22328100  | 1.40211700  |
|     | F | -2.42070400 | 0.84533600  | -0.63035700 |
|     | F | -2.64154600 | -1.22646800 | -0.07248900 |
|     | O | 4.12438700  | -0.26954300 | -0.03451800 |
|     | H | 4.68652800  | -0.95210800 | 0.33867200  |
| P3  | C | -1.55298400 | -0.07210900 | -0.08874300 |
|     | C | -0.14645500 | 0.53939900  | 0.10728900  |
|     | C | 1.02491700  | -0.47041900 | 0.11233200  |
|     | C | 2.29939300  | 0.17399500  | 0.49270800  |



|     |   |             |             |             |
|-----|---|-------------|-------------|-------------|
|     | C | 3.38027800  | 0.49303500  | -0.16465900 |
|     | H | 4.21853300  | 0.98269500  | 0.32003300  |
|     | H | 3.46828800  | 0.26851200  | -1.22757800 |
|     | F | 1.11168100  | -1.00998300 | -1.12880200 |
|     | F | 0.71051400  | -1.46823900 | 0.96873900  |
|     | F | -0.15294300 | 1.19502500  | 1.28001900  |
|     | F | 0.06043400  | 1.42191200  | -0.88209300 |
|     | F | -1.58613300 | -0.83556100 | -1.17385300 |
|     | F | -1.90131000 | -0.79840000 | 0.96416100  |
|     | F | -2.43310000 | 0.91362200  | -0.23328400 |
| P4  | C | -1.52729100 | -0.10703400 | -0.10093300 |
|     | C | -0.13951500 | 0.54325600  | 0.10138800  |
|     | C | 1.06510800  | -0.42504700 | 0.11517700  |
|     | C | 2.33867400  | 0.26988400  | 0.51934200  |
|     | H | 2.39162000  | 0.56596900  | 1.56348900  |
|     | C | 3.29999500  | 0.50056600  | -0.33349500 |
|     | H | 3.48578500  | 0.32229600  | -1.38147000 |
|     | F | 1.16823800  | -0.97013200 | -1.11389900 |
|     | F | 0.77793300  | -1.42067400 | 0.98759900  |
|     | F | -0.17189300 | 1.19929600  | 1.27662500  |
|     | F | 0.04354900  | 1.43353800  | -0.88557200 |
|     | F | -1.53734200 | -0.85871800 | -1.19482600 |
|     | F | -1.85404100 | -0.85580600 | 0.94343800  |
|     | F | -2.43747100 | 0.85271800  | -0.23457500 |
| P5  | C | -1.53764900 | -0.08936000 | -0.08697100 |
|     | C | -0.13618400 | 0.53830600  | 0.09047100  |
|     | C | 1.05346400  | -0.44916700 | 0.08433600  |
|     | C | 2.34050300  | 0.22518800  | 0.46679800  |
|     | H | 2.41617700  | 0.51818300  | 1.51332500  |
|     | C | 3.28483200  | 0.44415200  | -0.40781800 |
|     | H | 4.26977500  | 0.88357600  | -0.41601100 |
|     | F | 1.12483300  | -1.00147200 | -1.14075000 |
|     | F | 0.76530200  | -1.43486000 | 0.96999900  |
|     | F | -0.13859800 | 1.19383800  | 1.26764400  |
|     | F | 0.04283900  | 1.42738800  | -0.89743300 |
|     | F | -1.58369500 | -0.83527400 | -1.18331500 |
|     | F | -1.85536300 | -0.83744300 | 0.96106600  |
|     | F | -2.43484700 | 0.88599400  | -0.19701300 |
| PC1 | C | 1.75776600  | 0.14979900  | -0.08277600 |
|     | C | 0.36270200  | -0.08466400 | 0.54155700  |
|     | C | -0.75886300 | -0.48660700 | -0.44433800 |
|     | C | -2.07999900 | -0.53393700 | 0.20710300  |
|     | H | -1.80261600 | 2.49390400  | 0.60761800  |
|     | C | -2.90591700 | -1.50591800 | 0.48467800  |

|     |   |             |             |             |
|-----|---|-------------|-------------|-------------|
|     | H | -2.65904900 | -2.53652900 | 0.23073600  |
|     | H | -3.85799800 | -1.31614600 | 0.96911300  |
|     | F | -0.42646500 | -1.68757600 | -0.97746600 |
|     | F | -0.74924600 | 0.41759600  | -1.45969200 |
|     | F | 0.00868900  | 1.06602900  | 1.15135600  |
|     | F | 0.48093100  | -1.04373800 | 1.46862500  |
|     | F | 2.14763400  | -0.90652100 | -0.78239900 |
|     | F | 1.74199500  | 1.21514300  | -0.87438100 |
|     | F | 2.63298900  | 0.36293500  | 0.89423800  |
|     | O | -2.54068600 | 2.37476600  | 0.00474300  |
|     | H | -2.13771400 | 2.31380100  | -0.86528500 |
| PC2 | C | 1.66665100  | -0.39992200 | -0.21366400 |
|     | C | 0.35555500  | 0.02054100  | 0.49044500  |
|     | C | -0.64442600 | 0.82276700  | -0.37399700 |
|     | C | -1.76573700 | 1.39780400  | 0.44135100  |
|     | H | -1.49334100 | 2.24669800  | 1.06698300  |
|     | C | -2.96741300 | 0.88603300  | 0.39850400  |
|     | H | -3.92491700 | 1.06316200  | 0.86007300  |
|     | H | -2.77647300 | -1.63083800 | -0.92956800 |
|     | F | -1.10296600 | -0.01394600 | -1.33338900 |
|     | F | 0.05347300  | 1.80799600  | -0.98607500 |
|     | F | 0.68975800  | 0.75578800  | 1.56373700  |
|     | F | -0.25729900 | -1.10243800 | 0.91397000  |
|     | F | 1.40327800  | -1.00980300 | -1.36329700 |
|     | F | 2.43277600  | 0.65577500  | -0.44554400 |
|     | F | 2.32949900  | -1.24066500 | 0.57359500  |
|     | O | -3.06339400 | -2.03804000 | -0.10782300 |
|     | H | -2.25673600 | -2.12260000 | 0.40674900  |
| PC3 | C | 1.95632800  | -0.27852800 | 0.05604300  |
|     | C | 0.45952200  | -0.35525600 | -0.32195800 |
|     | C | -0.45166000 | 0.72407100  | 0.30550700  |
|     | C | -1.90891900 | 0.43548500  | 0.06935400  |
|     | H | -2.33688300 | -0.39352400 | 0.62811000  |
|     | C | -2.62015200 | 1.13721500  | -0.77192700 |
|     | H | -4.69384400 | -0.87910100 | -0.61462700 |
|     | H | -2.46529000 | 1.97432900  | -1.43591700 |
|     | F | -0.08771600 | 1.91655500  | -0.21345200 |
|     | F | -0.18908700 | 0.75649900  | 1.63447200  |
|     | F | 0.01568000  | -1.56726300 | 0.05708000  |
|     | F | 0.36973400  | -0.26093000 | -1.65814300 |
|     | F | 2.44207900  | 0.93247300  | -0.18774400 |
|     | F | 2.13433500  | -0.56780400 | 1.33792200  |
|     | F | 2.63185600  | -1.16223500 | -0.67355000 |
|     | O | -4.45965000 | -1.20673700 | 0.25735100  |

|     |             |             |             |             |
|-----|-------------|-------------|-------------|-------------|
|     | H           | -5.28942100 | -1.45138800 | 0.67225400  |
| PC4 | C           | 2.11093600  | -0.49547000 | 0.12851200  |
|     | C           | 0.96733400  | 0.41323000  | -0.37376800 |
|     | C           | -0.46650300 | 0.05438000  | 0.09073600  |
|     | C           | -1.52274700 | 0.96604700  | -0.41814500 |
|     | H           | -1.87487500 | 0.87612300  | -1.43485600 |
|     | F           | -0.45728300 | 0.10630900  | 1.45667200  |
|     | F           | -0.72138800 | -1.21092400 | -0.29268800 |
|     | F           | 0.98908800  | 0.39149700  | -1.71563100 |
|     | F           | 1.23182900  | 1.66604400  | 0.04488200  |
|     | F           | 2.17722000  | -0.47175300 | 1.45427400  |
|     | F           | 1.92829000  | -1.74523500 | -0.27455600 |
|     | F           | 3.26320800  | -0.05244900 | -0.36267700 |
|     | O           | -1.68555600 | 2.16489300  | 0.16072400  |
|     | H           | -1.29292600 | 2.17247500  | 1.04274900  |
|     | C           | -3.90318800 | -0.70008800 | 0.43691800  |
|     | H           | -4.19970400 | 0.28598200  | 0.84008200  |
| H   | -3.18005500 | -1.28122700 | 1.03820200  |             |
| O   | -4.34770900 | -1.11906300 | -0.59374700 |             |
| PC5 | C           | 1.99645300  | -0.30355700 | -0.24715600 |
|     | C           | 0.69007500  | -0.07656700 | 0.54548900  |
|     | C           | -0.40424900 | 0.73037300  | -0.17505100 |
|     | F           | -0.73443800 | 0.13644800  | -1.32925000 |
|     | F           | 0.09029900  | 1.95565000  | -0.45465500 |
|     | F           | 0.99962000  | 0.59416500  | 1.67357000  |
|     | F           | 0.19972500  | -1.27624400 | 0.88285600  |
|     | F           | 1.75406100  | -1.00831500 | -1.34356100 |
|     | F           | 2.54532600  | 0.85516600  | -0.58576300 |
|     | F           | 2.84996000  | -0.97465300 | 0.51636200  |
|     | O           | -2.67328600 | 1.33426400  | 0.14810100  |
|     | H           | -3.44307400 | -0.24824100 | -0.60563600 |
|     | C           | -1.67617300 | 0.94616500  | 0.68612400  |
|     | H           | -1.57917300 | 0.81472800  | 1.77341700  |
|     | O           | -2.41766500 | -1.46833000 | 0.31274000  |
|     | O           | -3.40347000 | -1.22655000 | -0.49337200 |
| PC6 | C           | 2.05137200  | -0.42183100 | -0.06951200 |
|     | C           | 0.50932900  | -0.35726700 | 0.00923400  |
|     | C           | -0.09518100 | 1.05150700  | 0.17061600  |
|     | C           | -2.95485800 | -1.57626400 | -0.04641900 |
|     | H           | -2.59032500 | -1.61240900 | -1.06606500 |
|     | H           | -2.87231400 | -2.43690000 | 0.60081800  |
|     | F           | 0.30002400  | 1.81739200  | -0.85070200 |
|     | F           | 0.36075600  | 1.58615500  | 1.32532200  |
|     | F           | 0.12128700  | -1.10309900 | 1.05826300  |

|      |   |             |             |             |
|------|---|-------------|-------------|-------------|
|      | F | 0.02102200  | -0.89907600 | -1.11864900 |
|      | F | 2.49453800  | 0.25471500  | -1.11952300 |
|      | F | 2.59558800  | 0.07748800  | 1.03217900  |
|      | F | 2.41965200  | -1.69213100 | -0.19170200 |
|      | O | -4.00996500 | -0.77700500 | 0.24003400  |
|      | H | -4.03653200 | -0.03799300 | -0.37911500 |
|      | C | -1.63680400 | 1.01319900  | 0.24885300  |
|      | H | -2.04236900 | 0.67350600  | 1.21396100  |
|      | O | -2.30471300 | 1.37509900  | -0.67289900 |
| PC7  | O | 1.45637600  | -0.01270300 | 0.00000000  |
|      | H | 0.00000000  | 1.12926900  | 0.00000000  |
|      | C | 0.99162100  | -1.12540000 | 0.00000000  |
|      | H | 0.77926200  | -1.66168700 | 0.93848400  |
|      | H | 0.77926200  | -1.66168700 | -0.93848400 |
|      | O | -0.98530900 | 1.17889500  | 0.00000000  |
|      | O | -1.40959800 | -0.04787900 | 0.00000000  |
| IM1  | C | -1.79667200 | 0.21898000  | -0.11769700 |
|      | C | -0.28073000 | 0.37139600  | 0.13945100  |
|      | C | 0.55677300  | -0.92863700 | 0.12664700  |
|      | C | 1.98483700  | -0.67735900 | 0.49623200  |
|      | H | 2.15104100  | -0.39552300 | 1.52940800  |
|      | C | 2.96703800  | -0.77639100 | -0.39015500 |
|      | H | 2.77095300  | -1.04868700 | -1.42077200 |
|      | H | 3.99195300  | -0.58379500 | -0.10093000 |
|      | F | 0.44319600  | -1.46932500 | -1.10560200 |
|      | F | -0.01888700 | -1.78295400 | 1.00754000  |
|      | F | -0.13048800 | 0.96966100  | 1.33214500  |
|      | F | 0.20594800  | 1.19698100  | -0.81461100 |
|      | F | -2.01967000 | -0.37276400 | -1.28357100 |
|      | F | -2.36630700 | -0.48894100 | 0.84686900  |
|      | F | -2.35049200 | 1.42782600  | -0.14062600 |
|      | O | 3.05265400  | 1.92628200  | 0.03923300  |
|      | H | 2.20762900  | 2.04546000  | -0.42774200 |
| IM1a | C | 1.86487400  | -0.34142400 | 0.10254000  |
|      | C | 0.65861200  | 0.56954600  | -0.21989000 |
|      | C | -0.73949800 | -0.03381100 | 0.03511300  |
|      | C | -1.84754200 | 0.85258800  | -0.43776300 |
|      | H | -1.83562300 | 1.08151500  | -1.49701900 |
|      | C | -2.79794900 | 1.27933400  | 0.38283100  |
|      | H | -3.61648900 | 1.88239900  | 0.01160100  |
|      | H | -2.79132300 | 1.02734100  | 1.43625500  |
|      | F | -0.83855800 | -0.31378700 | 1.34897600  |
|      | F | -0.79255200 | -1.22644200 | -0.63309600 |
|      | F | 0.74676000  | 0.90508700  | -1.52069600 |

|      |   |             |             |             |
|------|---|-------------|-------------|-------------|
|      | F | 0.77893100  | 1.68128600  | 0.52173900  |
|      | F | 1.82438700  | -0.74465200 | 1.36580100  |
|      | F | 1.87979200  | -1.40297100 | -0.69269300 |
|      | F | 2.98536700  | 0.34743000  | -0.08947600 |
|      | O | -3.85053500 | -1.19002400 | -0.17081800 |
|      | H | -3.04040600 | -1.64201800 | -0.46627900 |
| IM2  | C | -1.79683100 | 0.21882100  | -0.11766200 |
|      | C | -0.28089000 | 0.37129600  | 0.13934900  |
|      | C | 0.55701100  | -0.92848700 | 0.12660000  |
|      | C | 1.98499900  | -0.67654200 | 0.49618300  |
|      | H | 2.15099400  | -0.39368300 | 1.52910900  |
|      | C | 2.96740300  | -0.77636000 | -0.38992100 |
|      | H | 3.99221900  | -0.58321200 | -0.10066900 |
|      | H | 2.77157000  | -1.04984600 | -1.42030200 |
|      | F | 0.44356400  | -1.46936400 | -1.10554900 |
|      | F | -0.01829700 | -1.78293700 | 1.00761000  |
|      | F | -0.13069300 | 0.96961300  | 1.33202700  |
|      | F | 0.20553800  | 1.19690700  | -0.81478800 |
|      | F | -2.01989900 | -0.37314900 | -1.28342400 |
|      | F | -2.36637600 | -0.48898400 | 0.84705600  |
|      | F | -2.35067900 | 1.42762000  | -0.14072400 |
|      | O | 3.05234800  | 1.92635600  | 0.03916700  |
|      | H | 2.20786900  | 2.04616900  | -0.42863400 |
| IM3  | C | 2.21632700  | -0.57877900 | 0.00550500  |
|      | C | 1.10864300  | 0.46432500  | -0.27876900 |
|      | C | -0.27961400 | 0.08896400  | 0.29535400  |
|      | C | -1.44173200 | 0.84675900  | -0.34355300 |
|      | H | -1.41558200 | 0.67242000  | -1.42105300 |
|      | F | -0.25796200 | 0.36304300  | 1.62631300  |
|      | F | -0.45821300 | -1.23921300 | 0.15543000  |
|      | F | 1.00871000  | 0.59600700  | -1.61275800 |
|      | F | 1.50442500  | 1.63269300  | 0.24503800  |
|      | F | 2.21591100  | -0.90616100 | 1.29331600  |
|      | F | 2.03386400  | -1.67055900 | -0.72237700 |
|      | F | 3.39625000  | -0.05504800 | -0.30384500 |
|      | O | -1.27668400 | 2.22422500  | -0.14305600 |
|      | H | -1.14458200 | 2.40391400  | 0.79478000  |
|      | C | -2.78072400 | 0.35327200  | 0.19948100  |
|      | H | -3.53614500 | 1.11653500  | 0.00695700  |
|      | H | -2.75306700 | 0.10651800  | 1.26306600  |
|      | O | -3.13454500 | -0.83314500 | -0.53430300 |
|      | O | -4.22313300 | -1.37026700 | -0.07788100 |
| IM3a | C | -2.11556700 | -0.30493400 | 0.03932600  |
|      | C | -0.57850300 | -0.39759900 | -0.12202300 |

|      |   |             |             |             |
|------|---|-------------|-------------|-------------|
|      | C | 0.16504700  | 0.94513400  | 0.03067300  |
|      | C | 1.62895700  | 0.96083200  | -0.42585700 |
|      | H | 1.64601700  | 0.79110200  | -1.50456000 |
|      | F | 0.12304600  | 1.29913200  | 1.34285900  |
|      | F | -0.52398800 | 1.87573700  | -0.65912500 |
|      | F | -0.32889800 | -0.89290900 | -1.34465200 |
|      | F | -0.12437700 | -1.25523300 | 0.80663900  |
|      | F | -2.42360900 | 0.34298100  | 1.15719600  |
|      | F | -2.65982700 | 0.32240000  | -0.99308900 |
|      | F | -2.61755700 | -1.53218700 | 0.10247200  |
|      | O | 2.13952900  | 2.24762100  | -0.20262300 |
|      | H | 2.00510300  | 2.49326800  | 0.71963000  |
|      | C | 2.50066400  | -0.08739700 | 0.26172500  |
|      | H | 3.54331100  | 0.21683400  | 0.15735100  |
|      | H | 2.25286100  | -0.23994600 | 1.31412500  |
|      | O | 2.32321900  | -1.33430600 | -0.43384500 |
|      | O | 2.78050200  | -2.33791000 | 0.24892700  |
| IM4  | C | 2.00173400  | -0.35558500 | 0.01016300  |
|      | C | 0.75128700  | 0.51796000  | -0.25177000 |
|      | C | -0.57391100 | -0.10899500 | 0.24613100  |
|      | C | -1.83078800 | 0.49048000  | -0.37887900 |
|      | H | -1.75417100 | 0.40159100  | -1.46345500 |
|      | F | -0.62593100 | 0.07062300  | 1.59316200  |
|      | F | -0.52993800 | -1.43694300 | 0.01547300  |
|      | F | 0.67079300  | 0.72321000  | -1.57774200 |
|      | F | 0.94379400  | 1.69514200  | 0.35991700  |
|      | F | 2.01989500  | -0.76035500 | 1.27576700  |
|      | F | 2.01352800  | -1.41434600 | -0.78680100 |
|      | F | 3.09358000  | 0.36324400  | -0.22463100 |
|      | O | -1.90918800 | 1.85702400  | -0.06999600 |
|      | H | -1.84749900 | 1.97749700  | 0.88427300  |
|      | C | -3.07435600 | -0.27926000 | 0.08957800  |
|      | H | -3.94946100 | 0.32535000  | -0.21022800 |
|      | H | -3.12536900 | -0.35661600 | 1.18693000  |
|      | O | -3.24566100 | -1.49459700 | -0.50314900 |
| IM4a | C | 1.97468500  | -0.01788800 | 0.03837300  |
|      | C | 0.50714500  | 0.45214300  | -0.11046500 |
|      | C | -0.54155200 | -0.67300100 | 0.00589500  |
|      | C | -1.96272000 | -0.31182100 | -0.43376100 |
|      | H | -1.94112400 | -0.10251300 | -1.50459300 |
|      | F | -0.58494900 | -1.06897300 | 1.30751400  |
|      | F | -0.09510000 | -1.72146600 | -0.71572200 |
|      | F | 0.39141700  | 1.03575200  | -1.31370400 |
|      | F | 0.27484300  | 1.36479200  | 0.84860400  |

|     |   |             |             |             |
|-----|---|-------------|-------------|-------------|
|     | F | 2.11120300  | -0.77693600 | 1.11967900  |
|     | F | 2.36024300  | -0.70499800 | -1.02703400 |
|     | F | 2.75849200  | 1.04726300  | 0.16172500  |
|     | O | -2.77719900 | -1.43973500 | -0.24414300 |
|     | H | -2.70562700 | -1.73727600 | 0.66967900  |
|     | C | -2.53905600 | 0.90508400  | 0.30467300  |
|     | H | -3.62759500 | 0.90165800  | 0.11912800  |
|     | H | -2.42878100 | 0.81634300  | 1.39762600  |
|     | O | -2.08195500 | 2.11670600  | -0.12331800 |
| IM5 | C | -1.59670500 | -0.20090300 | -0.00764800 |
|     | C | -0.27183900 | 0.59637000  | -0.04380600 |
|     | C | 1.00954900  | -0.25110200 | 0.08680200  |
|     | C | 2.20846900  | 0.57781800  | 0.34011100  |
|     | H | 2.22282900  | 1.30496000  | 1.13624600  |
|     | F | 1.18738400  | -0.95540500 | -1.06327800 |
|     | F | 0.78275500  | -1.18438300 | 1.06382400  |
|     | F | -0.30329500 | 1.48444300  | 0.96793500  |
|     | F | -0.22544300 | 1.26780500  | -1.20336700 |
|     | F | -1.54245100 | -1.22354200 | -0.85363100 |
|     | F | -1.84151300 | -0.65669400 | 1.21190000  |
|     | F | -2.59447600 | 0.59988800  | -0.36735300 |
|     | O | 3.40266000  | 0.11378200  | -0.05427800 |
|     | H | 3.29240600  | -0.53731400 | -0.75903200 |
| IM6 | C | -2.03386000 | -0.04890100 | -0.04540000 |
|     | C | -0.55517900 | -0.50189600 | 0.01971900  |
|     | C | 0.45845400  | 0.66614300  | 0.04282700  |
|     | F | 0.52063600  | 1.16404200  | 1.29593000  |
|     | F | 0.00734700  | 1.64200200  | -0.76830900 |
|     | F | -0.30846000 | -1.25504600 | -1.06922300 |
|     | F | -0.40311900 | -1.25095800 | 1.11440900  |
|     | F | -2.26449800 | 0.87556300  | 0.88067100  |
|     | F | -2.32319400 | 0.44712600  | -1.23946900 |
|     | F | -2.81874600 | -1.09357000 | 0.18205200  |
|     | O | 2.75331100  | 1.31455900  | -0.21920600 |
|     | H | 2.69987800  | 1.62123400  | 0.69529000  |
|     | C | 1.87569400  | 0.28872800  | -0.41581500 |
|     | H | 1.88482100  | 0.01201000  | -1.46928500 |
|     | O | 2.22046300  | -0.87131200 | 0.36552400  |
|     | O | 3.18309500  | -1.54576200 | -0.19613700 |
| IM7 | C | 2.21827200  | -0.19254800 | -0.04424600 |
|     | C | 0.80096600  | 0.42534800  | -0.13128900 |
|     | C | -0.35012600 | -0.55854000 | 0.17195100  |
|     | C | -2.21610200 | 1.21855800  | 0.43752200  |
|     | H | -3.30357300 | 1.21154200  | 0.34406300  |

|      |   |             |             |             |
|------|---|-------------|-------------|-------------|
|      | H | -1.95867800 | 1.19741100  | 1.50048800  |
|      | F | -0.33900400 | -0.80726700 | 1.49776800  |
|      | F | -0.06979600 | -1.71239300 | -0.47080900 |
|      | F | 0.64965100  | 0.92631400  | -1.36551400 |
|      | F | 0.74739200  | 1.44077800  | 0.75814200  |
|      | F | 2.36130100  | -0.87182600 | 1.08575400  |
|      | F | 2.43713700  | -0.99776100 | -1.07196300 |
|      | F | 3.11401900  | 0.78793100  | -0.07369400 |
|      | O | -1.73905500 | 2.36627100  | -0.21873800 |
|      | H | -0.95734600 | 2.70008000  | 0.22589400  |
|      | C | -1.72837100 | -0.06065700 | -0.25288700 |
|      | H | -1.75974500 | 0.06093300  | -1.33700400 |
|      | O | -2.59634800 | -1.15422400 | 0.11297800  |
|      | O | -3.72394600 | -1.09391200 | -0.52635300 |
| IM7a | C | 2.28660800  | -0.09013700 | -0.08781500 |
|      | C | 0.87147400  | 0.53117600  | -0.15951300 |
|      | C | -0.26642500 | -0.40603000 | 0.31514100  |
|      | C | -2.14835300 | 1.31674500  | 0.32094400  |
|      | H | -2.31380700 | 1.22376600  | 1.39968800  |
|      | H | -1.39417200 | 2.09043500  | 0.14593200  |
|      | F | -0.25962600 | -0.41247700 | 1.66405200  |
|      | F | 0.02471600  | -1.65351300 | -0.10527700 |
|      | F | 0.64345900  | 0.89047900  | -1.43642600 |
|      | F | 0.87394300  | 1.64032600  | 0.59947000  |
|      | F | 2.49038700  | -0.62553000 | 1.10913700  |
|      | F | 2.43917400  | -1.02029300 | -1.01799700 |
|      | F | 3.18645500  | 0.86550200  | -0.29081900 |
|      | O | -3.33788900 | 1.58611100  | -0.38252000 |
|      | H | -3.84785000 | 2.24839900  | 0.08813800  |
|      | C | -1.64859500 | -0.01383000 | -0.20517300 |
|      | H | -1.65549900 | -0.04054800 | -1.29580600 |
|      | O | -2.55342700 | -1.02765000 | 0.26663000  |
|      | O | -2.85162200 | -1.89721700 | -0.65144900 |
| IM8  | C | 1.97088700  | 0.04686900  | 0.02115200  |
|      | C | 0.47605800  | 0.43286600  | -0.10458700 |
|      | C | -0.50793200 | -0.75035100 | 0.04738300  |
|      | C | -2.61747000 | 0.70732100  | 0.36345700  |
|      | H | -3.69135100 | 0.53608900  | 0.28042000  |
|      | H | -2.34780400 | 0.64336700  | 1.42184700  |
|      | F | -0.51434600 | -1.11176000 | 1.34432300  |
|      | F | -0.00813200 | -1.77772600 | -0.66984500 |
|      | F | 0.30533900  | 1.01750500  | -1.29866700 |
|      | F | 0.21171900  | 1.34290800  | 0.85884200  |
|      | F | 2.16667800  | -0.70494500 | 1.09582900  |



|                 |   |             |             |             |
|-----------------|---|-------------|-------------|-------------|
|                 | F | 2.37455100  | -0.61008600 | -1.05482100 |
|                 | F | 2.69052500  | 1.15753000  | 0.13600700  |
|                 | O | -2.35176000 | 1.96716500  | -0.19878600 |
|                 | H | -1.57395900 | 2.35269000  | 0.20963000  |
|                 | C | -1.94207200 | -0.43506400 | -0.42756600 |
|                 | H | -1.86867000 | -0.17044600 | -1.49119400 |
|                 | O | -2.62724500 | -1.61621000 | -0.24180800 |
| IM8a            | C | -2.08878500 | -0.08441000 | -0.03953700 |
|                 | C | -0.60056100 | -0.51085000 | -0.04653400 |
|                 | C | 0.39942700  | 0.66530600  | 0.09198600  |
|                 | C | 2.44160700  | -0.84390600 | 0.31657500  |
|                 | H | 2.49848700  | -0.59936600 | 1.38236300  |
|                 | H | 1.83800300  | -1.74644300 | 0.17542000  |
|                 | F | 0.43526000  | 1.02058300  | 1.38867100  |
|                 | F | -0.09457200 | 1.70702200  | -0.61005300 |
|                 | F | -0.36933700 | -1.16652600 | -1.19859100 |
|                 | F | -0.41480700 | -1.36469200 | 0.97345900  |
|                 | F | -2.32439300 | 0.74025800  | 0.97300000  |
|                 | F | -2.41156200 | 0.51171300  | -1.17741100 |
|                 | F | -2.84597800 | -1.16643500 | 0.10178500  |
|                 | O | 3.72036800  | -0.98923300 | -0.26310500 |
|                 | H | 4.22894600  | -1.62579100 | 0.24351800  |
|                 | C | 1.81264300  | 0.33448100  | -0.42268300 |
|                 | H | 1.72163100  | 0.11339500  | -1.49358300 |
|                 | O | 2.54906500  | 1.48388000  | -0.20743200 |
| IM9             | C | 0.68166800  | 0.02837700  | -0.06582500 |
|                 | H | 1.11374700  | 0.99155600  | 0.17563400  |
|                 | H | 1.23210500  | -0.88473700 | 0.09971900  |
|                 | O | -0.66683000 | -0.12530300 | 0.02372700  |
|                 | H | -1.10122400 | 0.72533900  | -0.07022000 |
| IM10            | O | 1.67124800  | -0.16879600 | -0.04600300 |
|                 | H | 1.77971000  | -0.68043100 | 0.76107500  |
|                 | C | 0.48033200  | 0.50478500  | -0.01206500 |
|                 | H | 0.42489800  | 1.15782700  | -0.88143600 |
|                 | H | 0.28713300  | 1.04958500  | 0.91549300  |
|                 | O | -0.59499800 | -0.47520100 | -0.13151300 |
|                 | O | -1.74796600 | 0.07453600  | 0.08717300  |
| HO <sub>2</sub> | O | 0.70984800  | 0.02831100  | -0.00000700 |
|                 | O | -0.58857600 | -0.12464100 | -0.00001400 |
|                 | H | -0.97017400 | 0.77064400  | 0.00016600  |
| HCHO            | O | 0.00000000  | 0.00000000  | 0.67103700  |
|                 | C | 0.00000000  | 0.00000000  | -0.52559400 |
|                 | H | 0.00000000  | 0.93967600  | -1.10736700 |
|                 | H | 0.00000000  | -0.93967600 | -1.10736700 |

|                                   |   |             |             |             |
|-----------------------------------|---|-------------|-------------|-------------|
| O <sub>2</sub>                    | O | 0.00000000  | 0.00000000  | 0.59437700  |
|                                   | O | 0.00000000  | 0.00000000  | -0.59437700 |
| NO <sub>2</sub>                   | O | 0.00000000  | 1.09098300  | -0.13784700 |
|                                   | N | 0.00000000  | 0.00000000  | 0.31507800  |
|                                   | O | 0.00000000  | -1.09098300 | -0.13784700 |
| NO                                | N | 0.00000000  | 0.00000000  | -0.60707600 |
|                                   | O | 0.00000000  | 0.00000000  | 0.53119100  |
| C <sub>3</sub> F <sub>7</sub> CHO | C | -1.56351500 | -0.08365000 | -0.10710200 |
|                                   | C | -0.16116400 | 0.51645000  | 0.13685500  |
|                                   | C | 1.01995200  | -0.47057400 | 0.07169800  |
|                                   | F | 1.07372100  | -1.01788700 | -1.14500700 |
|                                   | F | 0.82233400  | -1.44409700 | 0.98821900  |
|                                   | F | -0.15824600 | 1.07679900  | 1.36242400  |
|                                   | F | 0.04462900  | 1.47699000  | -0.77534800 |
|                                   | F | -1.62195100 | -0.64835300 | -1.30511400 |
|                                   | F | -1.84944000 | -0.99033500 | 0.81718900  |
|                                   | F | -2.46415600 | 0.88971400  | -0.04503200 |
|                                   | O | 3.11877200  | 0.54189400  | -0.45057900 |
|                                   | C | 2.35497500  | 0.23437600  | 0.40610600  |
|                                   | H | 2.52632200  | 0.39975500  | 1.48331300  |

**Table S2.** The excitation energy  $T_V$  (in eV), wavelength  $\lambda$  (in nm) and oscillator strength  $f$  (in atomic units) of the calculated excited states of the intermediates involved in the reaction of HFC-1447fz + OH, calculated using TD-DFT calculations at the M06-2X/6-311++G(d, p) level.

| Species | Parameters | Excited state |        |        |        |        |
|---------|------------|---------------|--------|--------|--------|--------|
|         |            | 1             | 2      | 3      | 4      | 5      |
| IM1     | $T_V$      | 0.3895        | 3.7886 | 4.5250 | 5.0276 | 6.8651 |
|         | $\lambda$  | 3182.96       | 327.25 | 274.00 | 246.61 | 180.60 |
|         | $f$        | 0.0000        | 0.0032 | 0.0050 | 0.0807 | 0.0039 |
| IM1a    | $T_V$      | 0.3939        | 3.7918 | 4.5057 | 5.1063 | 6.9831 |
|         | $\lambda$  | 3147.47       | 326.98 | 275.17 | 242.80 | 177.55 |
|         | $f$        | 0.0000        | 0.0051 | 0.0032 | 0.0923 | 0.0020 |
| IM2     | $T_V$      | 0.1664        | 5.4972 | 5.6328 | 7.1365 | 7.1882 |
|         | $\lambda$  | 7450.88       | 225.54 | 220.11 | 173.73 | 172.48 |
|         | $f$        | 0.0000        | 0.0748 | 0.0035 | 0.0001 | 0.0012 |
| IM2a    | $T_V$      | 0.2216        | 5.5097 | 5.6566 | 7.0721 | 7.1511 |
|         | $\lambda$  | 5596.13       | 225.03 | 219.18 | 175.32 | 173.38 |
|         | $f$        | 0.0000        | 0.0704 | 0.0018 | 0.0004 | 0.0015 |
| IM3     | $T_V$      | 0.3791        | 3.8032 | 5.6171 | 6.2494 | 7.1109 |
|         | $\lambda$  | 3270.15       | 326.00 | 220.73 | 198.39 | 174.36 |
|         | $f$        | 0.0000        | 0.0009 | 0.0081 | 0.0086 | 0.0014 |
| IM3a    | $T_V$      | 0.3910        | 3.7841 | 5.6870 | 6.1002 | 7.1805 |
|         | $\lambda$  | 3171.34       | 327.64 | 218.01 | 203.25 | 172.67 |
|         | $f$        | 0.0000        | 0.0012 | 0.0011 | 0.0099 | 0.0017 |
| IM4     | $T_V$      | 4.8199        | 5.7455 | 6.1112 | 6.3528 | 6.6484 |
|         | $\lambda$  | 257.23        | 215.79 | 202.88 | 195.17 | 186.49 |
|         | $f$        | 0.0009        | 0.0061 | 0.0155 | 0.0026 | 0.0522 |
| IM5     | $T_V$      | 0.4082        | 5.6078 | 5.8197 | 6.3980 | 7.0703 |
|         | $\lambda$  | 3037.60       | 221.09 | 213.04 | 193.79 | 175.36 |
|         | $f$        | 0.0000        | 0.0168 | 0.0502 | 0.0102 | 0.0002 |
| IM6     | $T_V$      | 0.1669        | 5.2880 | 5.6962 | 6.4532 | 6.9584 |
|         | $\lambda$  | 7426.57       | 234.46 | 217.66 | 192.13 | 178.18 |
|         | $f$        | 0.0000        | 0.0617 | 0.0031 | 0.0112 | 0.0006 |
| IM6a    | $T_V$      | 0.1734        | 5.7527 | 5.7741 | 6.2443 | 6.9435 |
|         | $\lambda$  | 7152.02       | 215.52 | 214.73 | 198.56 | 178.56 |
|         | $f$        | 0.0000        | 0.0581 | 0.0283 | 0.0007 | 0.0000 |
| IM7     | $T_V$      | 0.3074        | 3.3928 | 4.4584 | 5.4170 | 6.3662 |
|         | $\lambda$  | 4033.92       | 365.43 | 278.09 | 228.88 | 194.76 |
|         | $f$        | 0.0000        | 0.0007 | 0.0181 | 0.0115 | 0.0291 |
| IM7a    | $T_V$      | 0.2569        | 3.4391 | 4.6090 | 5.6754 | 6.1057 |
|         | $\lambda$  | 4826.32       | 360.51 | 269.01 | 218.46 | 203.06 |
|         | $f$        | 0.0000        | 0.0003 | 0.0028 | 0.0161 | 0.0290 |
| IM8     | $T_V$      | 3.6433        | 4.5956 | 5.1087 | 6.0243 | 6.2169 |
|         | $\lambda$  | 340.31        | 269.79 | 242.69 | 205.81 | 199.43 |

---

|     |           |         |        |        |        |        |
|-----|-----------|---------|--------|--------|--------|--------|
|     | f         | 0.0037  | 0.0120 | 0.0011 | 0.0247 | 0.0097 |
|     | $T_v$     | 0.1333  | 5.4251 | 5.9434 | 6.4948 | 7.0053 |
| IM9 | $\lambda$ | 9300.55 | 228.54 | 208.61 | 190.90 | 176.99 |
|     | f         | 0.0000  | 0.0563 | 0.0024 | 0.0096 | 0.0002 |

---

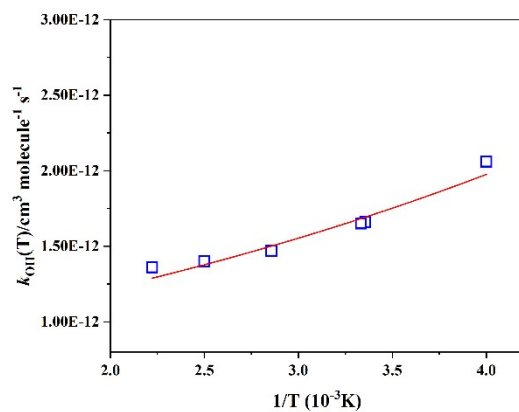

Figure S1. Arrhenius plot for the reaction between HFC-1447fz and OH radical.

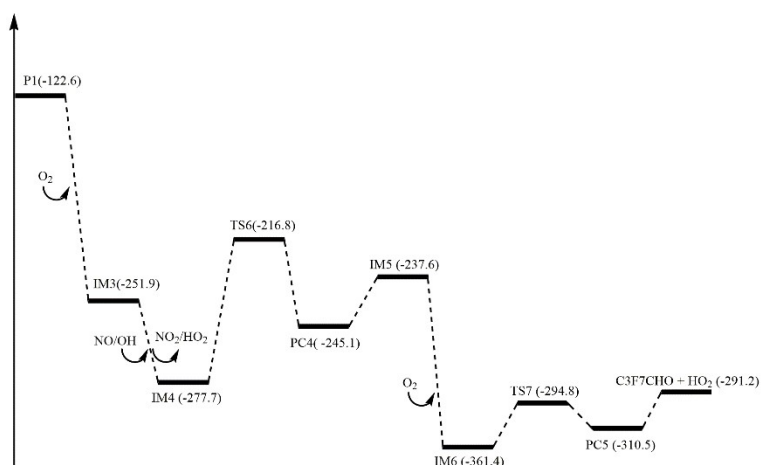

Figure S2. Potential energy profile of the degradation of P1 calculated at the CCSD(T)/cc-pVTZ//M06-2X/6-311++G (d, p) level of theory.

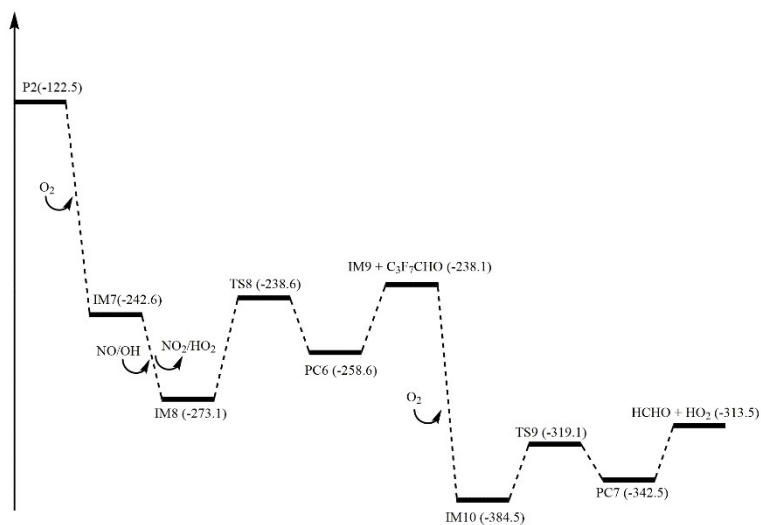

Figure S3. Potential energy profile of the degradation of P2 calculated at the

CCSD(T)/cc-pVTZ//M06-2X/6-311++G (d, p) level of theory.

### Global warming potential calculation.

GWP<sup>1,2</sup> of HFC-1447fz relative to CO<sub>2</sub> is calculated using equation (1):

$$\text{GWP} = \frac{a_0 \int_0^{\text{TH}} e^{-\frac{t}{\tau}} dt}{\text{AGWP}_{\text{CO}_2}} \quad (1)$$

where  $a_0$  is the total instantaneous infrared radiative forcing ( $\text{W m}^{-2} \text{ppbv}^{-1}$ ), TH is the time horizon and  $\text{AGWP}_{(\text{CO}_2)}$  is the absolute GWP of CO<sub>2</sub> for the same time horizon.  $a_0$  can be obtained from the radiative forcing function per unit cross section per wave-number ( $\text{W m}^{-2} (\text{cm}^{-1})^{-1} (\text{cm}^2 \text{ per molecule})^{-1}$ ),  $F(\nu_k)$  evaluated at the scaled band centre frequency<sup>3</sup>  $\nu_k$  and the intensity  $A_k$  of the corresponding vibrational mode of HFC-1447fz calculated at the UM06-2X/6-311++G\*\* level of theory as

$$a_0 = \sum_k A_k F(\nu_k) \quad (2)$$

Then the radiative efficiency can be calculated using the method proposed by Pinnock et al.<sup>2</sup>. The very short-lived substance (VSLS) lifetime need to be adjusted and the correction factor  $f(\tau)$  was calculated based on the atmospheric lifetime of the compound using following formula<sup>4</sup>:

$$f(\tau) = \frac{\alpha \tau^b}{1 + c \tau^d} \quad (3)$$

where a, b, c, and d are the constants and are equal to 2.962, 0.9312, 2.994 and 0.9302, respectively, and  $\tau$  is the atmospheric lifetime in years.

### Photochemical ozone creation potential (POCP) calculation.

The POCP was estimated using the following expression<sup>5,6</sup>:

$$\varepsilon^{\text{POCP}} = \alpha_1 \times \gamma_s \times \gamma_R^\beta (1 - \alpha_2 \times n_c) \quad (4)$$

In which  $\varepsilon^{\text{POCP}}$  is the estimated POCP,  $\alpha_1$ ,  $\alpha_2$  and  $\beta$  are constants with the values 111, 0.04 and 0.5.  $\gamma_s$  is a structure-based index,

$$\gamma_s = \left(\frac{n_b}{M}\right) \times \left(\frac{28}{6}\right) \quad (5)$$

$\gamma_R^\beta$  is the scaled OH reactivity relative to ethylene,

$$\gamma_R^\beta = \left(\frac{k_{\text{OH}}}{n_B}\right) \times \left(\frac{6}{8.64 \times 10^{-12}}\right) \quad (6)$$

where  $M$  is the molecular mass,  $n_B$  is the total number of C–C and C–H bonds,  $n_C$  is number of carbons.

### References:

1. P. Blowers, K. F. Tetrault and Y. T. Morehead, *Theor. Chem. Acc.*, 2008, 119, 369–381.
2. S. Pinnock, M. D. Hurley, K. P. Shine, T. J. Wallington and T. J. Smyth, *J. Geophys. Res.: Atmos.*, 1995, 100, 23227–23238.
3. F. Y. Bai, X. Wang, Y. Q. Sun, R. S. Wang and X. M. Pan, *RSC Adv.*, 2016, 6, 36096–36108.
4. O. Hodnebrog, M. Etminan, J. S. Fuglestedt, G. Marston, G. Myhre, C. J. Nielsen, K. P. Shine and T. J. Wallington, *Rev. Geophys.*, 2013, 51, 300–378.
5. R. G. Derwent, M. E. Jenkin, S. M. Saunders and M. J. Pilling, *Atmos. Environ.*, 1998, 32, 2429–2441.
6. M. Jenkin, Photochemical ozone and PAN creation potentials: rationalisation and methods of estimation, AEA Technology plc, National Environmental Technological Centre, Culham, Oxfordshire, UK, 1998.
